# Supplementary material for: The Relationship between Chinese Outpatients’ Characteristics and Healthcare-Seeking Behavioral Decision-Making: Decision Tree and Linear Regression Analyses Based on Survey Data in Jiaxing
Source: Research Square preprint supplement (doi:10.21203/rs.3.rs-128299/v1), 2021-01-04
Supplement: Supplementary file 1 [file 03c10d1a8d41063390f062bd.xlsx]

## Sheet: The 1st hospital
The 1st hospital of Jiaxing
Sex	Age	Profession	Birthplace	location of residence	having or not having medical insurance	the degree of self-recognition of the disease	Qestion1	Qestion2.1	Qestion2.2	Qestion2.3	Qestion2.4	Qestion2(Weight Sum)	Qestion3
0	1	1	0	0	0	0	A	A	B	G	E	1.1	A
0	0	3	2	1	0	0	C	A	E	G	C	2.2	A
0	2	3	2	1	0	0	A	A	E	B		1.21	A
1	1	3	0	0	0	0	C	B				-4	A
0	1	2	1	1	0	1	C	A	C	E		0.99	A
1	0	2	0	0	0	1	C	A	E	F		2.53	A
1	1	0	1	1	0	1	C	A	G			3.57	A
1	1	2	0	0	0	1	A	A	B	C		-0.22	A
1	1	2	0	0	0	0	C	A	G	E		2.97	A
0	0	3	2	1	1	0	C	A	B	C		-0.22	A
1	1	2	0	0	0	1	C	A	E	C	B	0.9	A
0	2	2	1	0	0	0	A	A	G	F	E	3	A
1	1	1	1	0	0	1	A	E	A	F	B	1.6	A
1	1	2	0	0	0	0	C	B				-4	A
1	1	2	0	0	0	1	A	A	E	F		2.53	A
1	2	1	2	0	1	0	C	A	G	B		1.87	A
1	1	3	2	0	0	1	C	A	B	C		-0.55	A
0	1	2	2	0	0	1	A	A	B			0.56	A
1	2	2	2	0	0	1	A	E	H	A	C	0.6	A
0	2	1	0	0	0	2	C	E	A	B	C	0.5	A
0	2	2	1	0	0	0	A	A	B	C		-0.22	A
0	2	2	0	0	0	1	C	E	C	B		-1.43	A
0	2	0	0	0	0	2	A	E	A	B	C	0.5	A
1	0	3	1	0	0	1	A	A	B	E		0.66	A
1	0	2	0	0	0	0	C	A	G	F	E	3	A
1	2	0	0	0	0	1	A	A	E	G	C	2.2	A
1	2	2	1	1	0	2	A	A	E	F		2.53	A
0	1	3	1	1	1	1	C	G	F	E		2.2	A
0	0	2	1	0	0	0	A	B	A	G	C	-0.1	A
0	2	0	1	1	0	2	C	A	E			2.71	C
0	1	1	0	0	0	1	A	A	G	F		3.19	C
1	2	3	1	1	0	2	A	A	G	E	B	2.3	A
0	2	1	2	1	1	1	C	A	F	E	C	2.1	A
1	0	1	2	0	1	1	A	E	C	B		-1.43	A
0	2	1	1	1	0	1	C	A	C	E		0.99	B
0	2	0	1	1	0	1	C	B	E	C		-2.09	A
1	2	0	2	1	0	1	C	A				4	A
0	2	2	1	1	0	1	A	E	A	C	B	0.6	A
0	2	3	1	1	0	0	A	A	C			0.99	A
1	2	2	0	0	0	0	C	A	E	C	B	0.9	A
1	1	1	2	0	1	2	C	A	E	G		2.75	B
1	2	1	1	0	0	2	C	A	E	C	B	0.9	B
1	2	1	0	0	0	0	A	A	B	E		0.66	A
1	0	1	2	1	1	1	C	F	A	G		2.86	A
0	1	3	0	0	0	0	A	A	E	G	C	2.2	D
0	2	1	0	0	0	0	C	A	E	C	B	0.9	A
0	0	1	2	0	0	0	C	C	B			-3.43	A
0	0	3	0	0	0	0	A	A	E	C	F	1.5	A
1	1	3	0	0	0	1	A	A	E	C	B	0.9	B
0	2	0	0	0	0	1	C	A	E	C	B	0.9	A

## Sheet: The 2nd hospital
The 2nd hospital of Jiaxing
Sex	Age	Profession	Birthplace	location of residence	having or not having medical insurance	the degree of self-recognition of the disease	Qestion1	Qestion2.1	Qestion2.2	Qestion2.3	Qestion2.4	Qestion2(Weight Sum)	Qestion3
1	0	3	1	0	1	0	A	B	C			-3.57	A
1	2	1	0	0	0	1	A	B	E	C	F	-1.7	D
1	1	1	0	0	0	1	A	A	C	B		-0.11	A
0	2	2	0	0	0	1	A	A	E	B	C	0.8	A
1	1	3	0	0	0	0	A	B	C			-3.57	A
0	1	3	0	0	0	1	A	A	B			0.56	A
0	2	2	1	0	0	1	C	A	C	B		-0.11	A
1	0	2	1	0	0	0	A	E	A	C		1.1	A
0	0	3	0	0	0	1	A	A	C	G		1.43	A
0	0	1	1	1	0	1	C	A	C	E		0.99	A
1	0	2	2	0	0	0	C	A	C	B	D	-0.3	A
1	2	2	0	0	0	0	A	A	F	B		1.54	A
1	0	2	0	0	0	1	A	B	C	E		-2.53	A
1	1	1	0	0	1	0	C	B	E	C		-2.09	A
0	0	3	2	0	0	0	C	B	C			-3.57	A
1	0	3	2	1	1	0	C	A	G	C	E	2	A
0	2	2	1	0	0	1	C	B	C	E		-2.53	A
0	2	2	1	0	0	2	C	A	B	E	G	0.9	A
0	2	3	0	0	0	1	A	A	E	G	B	2.1	B
1	2	0	0	0	0	1	A	E	A	B	C	0.5	A
1	1	1	0	0	0	0	C	B	F	C		-1.76	C
0	1	2	2	1	0	0	A	E	A	G	C	1.9	C
0	1	2	0	0	0	0	C	C	E			-1.28	B
0	0	2	1	1	0	0	A	A	E			2.71	A
1	2	1	0	0	0	1	A	B	G	C		-1.43	A
1	1	2	2	0	0	0	A	G	E	A	F	2.5	B
1	2	2	0	0	0	1	A	B	G	C		-1.43	C
1	1	3	2	0	0	0	A	A	B	C	D	-0.4	A
0	1	2	1	1	0	2	A	A	E	G		2.75	A
1	1	3	2	0	0	0	C	F	C	B		-0.99	A
0	2	1	0	0	0	0	C	A	G	E		2.97	A
0	0	3	0	1	0	1	A	A	C	E	G	1.2	A
0	2	2	1	0	0	2	C	A	B	F	C	0.5	A
0	2	1	0	0	0	2	C	B				-4	D
1	2	1	1	0	0	2	A	A	E	C		1.43	D
0	2	1	0	0	0	2	C	E	A	G		2.42	A
1	1	3	2	0	1	1	C	A	G			3.57	D
1	1	2	1	1	0	0	C	A	E			2.71	C
1	0	3	2	1	1	0	A	A	E			2.71	A
1	2	2	0	0	0	1	A	A	G	E	C	2.4	A
0	0	3	2	0	1	0	A	C	B			-3.43	A
0	0	3	2	0	1	0	C	B				-4	B
1	0	3	2	0	1	1	A	A	C			0.99	A
1	2	1	0	0	0	1	A	B				-4	A
0	0	3	2	0	0	0	A	A	E			2.71	A
1	2	3	0	0	0	1	A	A	B	C		-0.22	A
1	1	2	0	0	0	1	A	B	F			-1.42	C
0	1	1	0	0	0	1	A	B	A	C		-1.1	A
1	1	3	0	0	0	1	C	B	C	A		-1.87	A
1	1	2	1	1	0	0	C	A				4	A

## Sheet: The 3rd hospital
The 3rd hospital
Sex	Age	Profession	Birthplace	location of residence	having or not having medical insurance	the degree of self-recognition of the disease	Qestion1	Qestion2.1	Qestion2.2	Qestion2.3	Qestion2.4	Qestion2(Weight Sum)	Qestion3
0	0	1	2	0	1	0	A	A	B	C		-0.22	A
1	1	1	2	1	1	1	C	A				4	A
0	1	1	2	1	1	2	C	A	C			0.99	D
0	0	3	1	0	1	1	A	C	E	G	H	-0.4	C
0	0	2	0	0	0	0	A	A	H	C		0.77	A
1	1	1	2	0	1	1	C	B	C	G		-2.09	B
1	1	2	0	0	0	0	A	B				-4	A
0	2	1	1	1	0	2	A	E	A			2.29	A
1	1	3	2	1	0	0	A	A	E			2.71	A
1	1	3	0	0	0	0	C	A	E	B		1.21	A
1	2	0	0	0	0	2	A	A	E			2.71	A
1	1	0	2	0	1	1	A	A	E			2.71	A
0	1	1	0	0	0	1	C	B	C	E		-2.53	A
0	1	1	2	0	1	0	A	B	C	E		-2.53	A
1	0	2	1	1	0	1	C	E	A	C		1.1	A
1	1	1	1	0	1	1	C	A	E			2.71	A
1	0	3	0	0	0	0	A	A	B			0.56	A
1	2	0	2	0	0	1	A	B	C			-3.57	A
0	1	1	2	0	1	1	C	A	E			2.71	A
1	0	0	1	1	0	1	C	A	E	C		1.43	B
0	0	2	0	0	0	0	A	G	A			3.43	B
0	1	1	2	1	1	1	C	A	C			0.99	A
0	1	3	0	0	0	0	A	A				4	A
0	1	2	1	0	0	1	C	E	C	B		-1.43	A
0	1	2	2	0	0	1	A	E	A	B		0.88	A
1	2	1	1	0	0	0	A	C	B			-3.43	A
1	0	2	0	0	0	0	A	C	B	A		-1.76	A
0	1	0	0	0	0	2	C	A	E	G		2.75	A
1	0	2	0	0	0	0	C	B				-4	A
0	0	1	2	0	1	1	A	E	A	G		2.42	A
1	0	3	0	1	1	1	A	A				4	A
1	1	3	2	0	0	1	A	A	C			0.99	A
1	1	1	1	1	1	0	A	A	E			2.71	A
1	0	2	0	1	0	1	A	B				-4	A
0	0	3	2	1	1	0	A	A				4	D
1	1	1	2	0	1	1	C	A	H	E		1.65	A
1	1	2	1	1	0	2	C	A	E	C		1.43	A
1	2	1	0	0	0	0	A	A	B	C		-0.22	A
1	1	2	1	1	0	1	C	A	E			2.71	A
0	1	2	0	0	0	0	C	B	C			-3.57	A
1	1	3	2	0	1	1	C	A	E			2.71	A
0	2	3	0	0	0	1	C	E	B	F	A	0	A
0	0	3	1	0	0	1	A	A	B			0.56	A
1	1	3	2	1	0	1	A	E	A	F		2.2	A
1	0	2	2	0	0	1	A	C	E	G	B	-0.7	C
1	1	3	0	0	0	1	C	B				-4	A
1	1	0	0	0	0	1	A	A	F	C	G	1.9	D
1	1	2	1	1	0	1	A	A				4	B
1	1	3	1	0	0	0	A	E	A	C	G	1.3	A
1	0	3	2	0	1	0	C	A	B			0.56	A
1	2	0	0	0	0	1	C	B	C			-3.57	A
1	1	1	1	1	0	0	A	A	E	C		1.43	A
0	0	3	2	1	1	0	C	A	F	E		2.64	A
0	0	2	2	0	0	1	A	B	E	C		-2.09	A
0	2	0	1	1	0	1	C	C	E	B		-1.87	A
0	2	0	1	1	0	0	C	A				4	A
1	2	2	1	1	0	1	C	A	E			2.71	A
1	1	2	0	0	0	1	C	A	E	C		1.43	A
0	2	1	0	0	0	1	A	A	E	C		1.43	A
1	2	0	1	1	0	0	A	B	A	C		-1.1	A
0	0	3	0	1	0	0	A	A	C	B	E	1.38778e-16	A
0	0	3	1	1	0	0	C	F	E			1.57	A
1	1	3	1	0	0	1	A	A	G	E		2.97	A
1	2	2	0	0	0	0	A	F	B	C		-1.1	A
1	0	3	0	0	0	1	A	E	G	C		0.77	A

## Sheet: Community Health Center
Community Health Center
Sex	Age	Profession	Birthplace	location of residence	having or not having medical insurance	the degree of self-recognition of the disease	Qestion1	Qestion2.1	Qestion2.2	Qestion2.3	Qestion2.4	Qestion2(Weight Sum)	Qestion3
1	1	3	2	0	1	0	C	A	B	C		-0.22	A
1	2	1	1	0	0	1	C	B	C	E		-2.53	A
0	2	2	2	0	0	1	C	E	C	B		-1.43	B
0	2	1	0	0	0	0	C	D	E	C	B	-1.5	A
1	0	2	1	0	0	1	C	A	H	F	C	1.4	A
0	2	2	0	0	0	1	C	A	E	B		1.21	A
0	0	3	2	0	1	0	C	E	C	B		-1.43	A
0	1	2	0	0	0	0	C	C	B			-3.43	A
1	1	3	1	1	1	1	C	A	E	C		2.09	A
0	2	1	2	0	0	1	C	B	E	C		-2.09	A
0	2	1	0	0	0	2	C	A	B			0.56	B
0	2	1	0	0	0	1	C	D	B	C		-2.86	A
1	0	1	0	0	1	0	C	B	C			-3.57	A
1	1	2	2	0	0	1	C	A	B			0.56	A
1	0	1	2	0	1	0	C	B				-4	A
1	0	2	1	1	1	0	C	A				4	A
1	0	2	1	0	0	1	C	A	B			0.56	A
1	0	3	2	1	0	1	C	A	E			2.71	A
1	2	2	1	0	0	1	C	E	B	C		-1.54	A
0	2	1	0	0	0	1	C	B	E	C		-2.09	A
0	1	3	2	0	1	0	C	B				-4	A
1	2	1	0	0	0	1	C	B	C	H		-2.97	A
1	1	1	0	0	0	1	C	E	D	C	B	-1.2	B
0	2	1	1	0	0	1	C	B	C	D	E	-2.8	D
1	0	2	1	1	0	1	C	A	E			2.71	A
1	1	1	0	0	0	1	C	E	C	B		-1.43	A
1	2	1	2	0	0	1	C	B	E	D		-1.87	A
1	2	1	0	0	0	0	C	D	E	B		-1.43	D
1	2	2	1	0	0	1	C	B	C	E	D	-2.5	A
0	1	3	0	0	0	0	C	B	C	E		-2.53	A
